# Supplementary material
Source: ML conference proceedings conference paper supplement (https://aclanthology.org/2026.americasnlp-6.15)

## RAN\_sum vs. NLP Performance

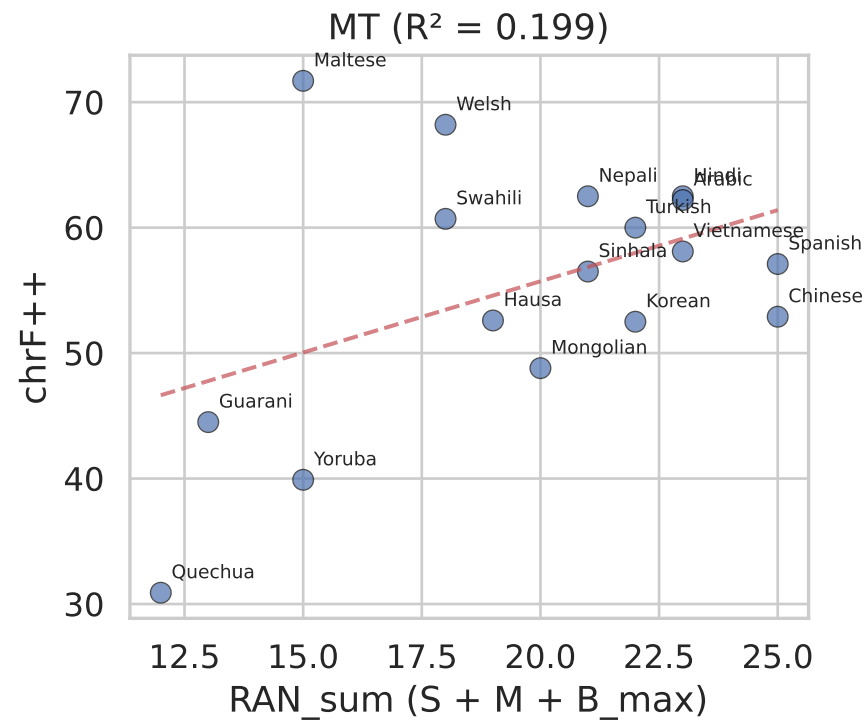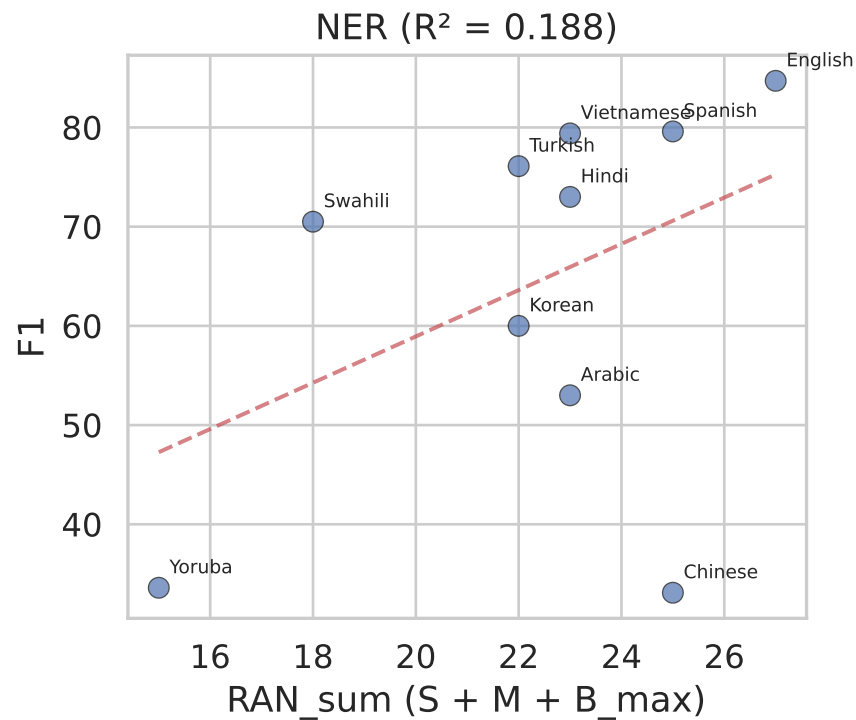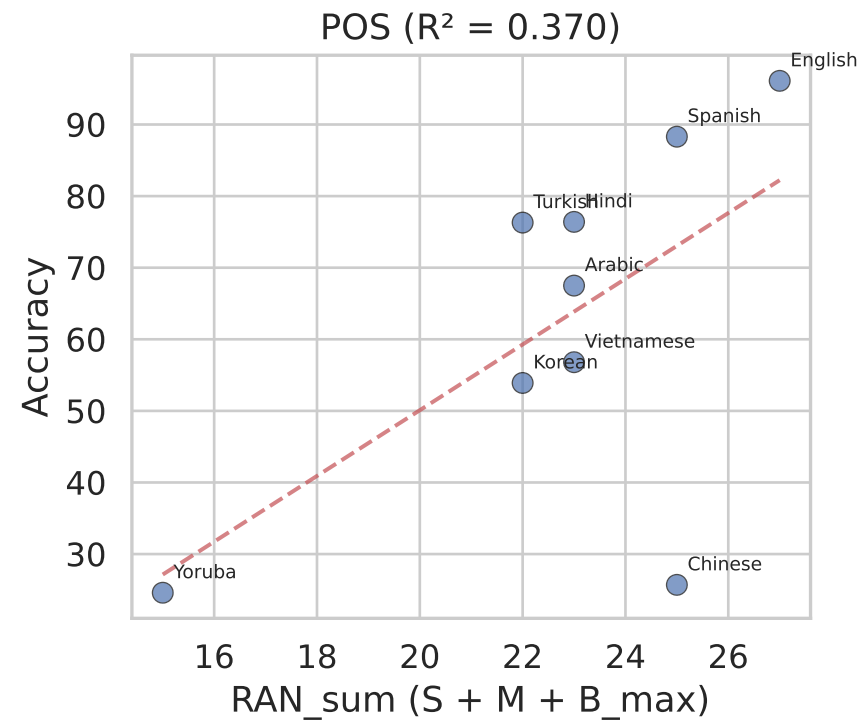

Supplement: SupplementaryMaterial [file plot1_scatter_ransum.pdf › plot1_scatter_ransum.pdf]
